# Supplementary material
Source: PubMed Central journal article supplement (PMC4849485)
Supplement: NIHMS754765-supplement-Supplemental_revised.pdf [file NIHMS754765-supplement-Supplemental_revised.pdf]

## 1 Supplementary Table S1. Formulation and composition of the experimental diets.

| Ingredient                | Control Wheat<br>g | <i>SBEIIa/b</i> -AB Wheat<br>g | Inulin<br>g | Cellulose<br>g |
|---------------------------|--------------------|--------------------------------|-------------|----------------|
| Casein                    | 64                 | 50                             | 150         | 150            |
| L-Cystine                 | 3                  | 3                              | 3           | 3              |
| Control Wheat             | 560                | 0                              | 0           | 0              |
| <i>SBEIIa/b</i> -AB Wheat | 0                  | 560                            | 0           | 0              |
| Corn Starch†              | 0                  | 36                             | 328         | 365            |
| Maltodextrin 10           | 110                | 110                            | 110         | 110            |
| Dextrose                  | 93                 | 93                             | 150         | 150            |
| Cellulose, BW200          | 0                  | 0                              | 0           | 100            |
| Inulin, Orafti HP         | 0                  | 0                              | 100         | 0              |
| Soybean Oil               | 64                 | 64                             | 75          | 75             |
| Mineral Mix S10026B‡      | 50                 | 50                             | 50          | 50             |
| Vitamin Mix V10001§       | 10                 | 10                             | 10          | 10             |
| Choline Bitartrate        | 2                  | 2                              | 2           | 2              |
| Total                     | 956                | 978                            | 978         | 1015           |
| Composition               |                    |                                |             |                |
| Protein                   | 134.9              | 134.9                          | 135.0       | 135.0          |
| Carbohydrate              | 635.2              | 634.8                          | 635.0       | 635.0          |
| Fat                       | 75.2               | 75.2                           | 75.1        | 75.0           |

2

3 † MELOJEL® Corn Starch (Ingredient, Linden, NJ).

4 ‡ Mineral Mix S10026B (Research Diets Inc., New Brunswick, NJ), contained, per kg of mix, 260 g of Calcium Phosphate, 110 g of  
5 Calcium Carbonate, 330 g of Potassium Citrate Monohydrate, 51.8 g of Sodium Chloride, 8.38 g of Magnesium Oxide, 51.52 g of  
6 Magnesium Sulfate Heptahydrate, 0.06 g of Ammonium Molybdate Tetrahydrate, 0.385 g of Chromium Potassium Sulfate, 0.21 g of  
7 Copper Carbonate, 4.2 g of Ferric Citrate, 2.45 g of Manganous Carbonate, 0.007 g of Potassium Iodate, 0.04 g of Sodium Fluoride,  
8 0.007 g of Sodium Selenite, 1.12 g of Zinc Carbonate, and 179.821 g of Sucrose.

9 § Vitamin Mix V10001 (Research Diets Inc., New Brunswick, NJ), contained, per kg of mix, 0.8 g of Vitamin A Acetate (500,000  
10 IU/gm), 1 g of Vitamin D3 (100,000 IU/gm), 10 g of Vitamin E Acetate (500 IU/gm), 0.08 g of Menadione Sodium Bisulfite, (62.5%  
11 Menadione), 2 g of Biotin (1.0%), 1 g of Cyanocobalamin (0.1%), 0.2 g of Folic Acid, 3 g of Nicotinic Acid, 1.6 g of Calcium  
12 Pantothenate, 0.7 g of Pyridoxine-HCl, 0.6 g of Riboflavin, 0.6 g of Thiamin HCl, and 978.42 g of Sucrose.

13

14

1 Supplementary Table S2. Retention time and quantifier ions of short chain fatty acid DMTBS-esters.

| Analyte       | t <sub>r</sub> (min) | Quant Ion (m/z) | Qual Ion |    |
|---------------|----------------------|-----------------|----------|----|
| d3-acetate    | 1.950                | 120.1           | 162.1    | 2  |
| acetate       | 1.954                | 117.1           | 159.1    | 3  |
| d3-propionate | 2.211                | 134.1           | 173.1    | 4  |
| propionate    | 2.218                | 131.1           | 186.1    | 5  |
| d3-butyrate   | 2.465                | 148.1           | 190.1    | 6  |
| butyrate      | 2.475                | 145.1           | 187.1    | 7  |
| 15:1n5 me     | 5.670                | 221.1           | 180.1    | 8  |
|               |                      |                 |          | 9  |
|               |                      |                 |          | 10 |
|               |                      |                 |          | 11 |
|               |                      |                 |          | 12 |

13  
14  
15  
16  
17  
18  
19  
20  
21  
22  
23  
24  
25  
26  
27  
28  
29  
30  
31  
32  
33  
34  
35  
36  
37  
38  
39  
40  
41  
42  
43  
44  
45  
46  
47  
48  
49

For Review Only

1 Supplementary Table S3. Spike density, spikelet number and kernel number for *SBEIIa/b*-AB mutants and wild-  
 2 type sib control lines and fixed model ANOVAs for combined locations. Untransformed arithmetic means are  
 3 reported for the three locations combined and separately.

| <i>SBEIIa/b</i> -AB                           | Spike Density<br>spikes m <sup>-2</sup> | Spikelet Number<br>spikelets spike <sup>-1</sup> | Kernel Number<br>kernels spike <sup>-1</sup> |
|-----------------------------------------------|-----------------------------------------|--------------------------------------------------|----------------------------------------------|
| All Locations                                 | 514.3 ± 37.0                            | 17.9 ± 0.3                                       | 32.5 ± 2.8                                   |
| Imperial Valley                               | 520.3 ± 43.3                            | 17.8 ± 0.5                                       | 40.9 ± 4.8                                   |
| Sacramento Valley                             | 627.9 ± 65.0                            | 17.4 ± 0.2                                       | 19.7 ± 1.3                                   |
| San Joaquin Valley                            | 394.7 ± 49.1                            | 18.5 ± 0.5                                       | 36.9 ± 2.5                                   |
| <b>Control</b>                                |                                         |                                                  |                                              |
| All Locations                                 | 534.6 ± 25.4                            | 17.6 ± 0.2                                       | 30.7 ± 2.5                                   |
| Imperial Valley                               | 516.7 ± 16.7                            | 17.0 ± 0.4                                       | 33.5 ± 1.5                                   |
| Sacramento Valley                             | 640.5 ± 35.8                            | 17.7 ± 0.4                                       | 17.8 ± 2.3                                   |
| San Joaquin Valley                            | 446.7 ± 34.5                            | 18.0 ± 0.2                                       | 40.8 ± 0.8                                   |
| <b>Source of Variation</b>                    |                                         |                                                  |                                              |
| Genotype† ( <i>P</i> )                        | 0.5                                     | 0.3                                              | 0.3                                          |
| Location‡ ( <i>P</i> )                        | 0.0015                                  | 0.2                                              | < 0.0001                                     |
| Genotype*Location† ( <i>P</i> )               | 0.8                                     | 0.2                                              | 0.048                                        |
| Block(Location)† ( <i>P</i> )                 | 0.2                                     | 0.1                                              | 0.09                                         |
| Variation Explained ( <i>R</i> <sup>2</sup> ) | 0.78                                    | 0.73                                             | 0.91                                         |

4 † Error used = MS(Error)

5 ‡ Error used = MS(block(location))

6

7

8

1 Supplementary Table S4. RVA parameters for *SBEIIa/b-AB* mutants and wild-type sib control lines and fixed model ANOVAs for combined  
 2 locations. Untransformed arithmetic means are reported for three locations combined and separately.

| <i>SBEIIa/b-AB</i>                            | Peak<br>RVU | Trough<br>RVU | Breakdown<br>RVU | Final<br>Viscosity<br>RVU | Setback<br>RVU | Peak Time<br>minutes | Pasting<br>Temperature<br>°C |
|-----------------------------------------------|-------------|---------------|------------------|---------------------------|----------------|----------------------|------------------------------|
| All Locations                                 | 83.8 ± 2.3  | 77.7 ± 2.6    | 6.1 ± 0.4        | 155.7 ± 4.6               | 78.0 ± 2.2     | 7.0 ± 0.01           | 76.5 ± 3.0                   |
| Imperial Valley                               | 92.2 ± 2.4  | 87.4 ± 2.8    | 4.8 ± 0.6        | 174.5 ± 5.3               | 87.1 ± 2.6     | 7.0 ± 0.02           | 78.7 ± 4.8                   |
| Sacramento Valley                             | 73.8 ± 2.4  | 66.8 ± 2.7    | 6.9 ± 0.5        | 136.2 ± 2.9               | 69.4 ± 1.4     | 7.0 ± 0.02           | 79.9 ± 4.5                   |
| San Joaquin Valley                            | 85.3 ± 2.9  | 78.9 ± 3.3    | 6.5 ± 0.8        | 156.3 ± 5.4               | 77.4 ± 3.1     | 7.0 ± 0.03           | 70.9 ± 6.3                   |
| <b>Control</b>                                |             |               |                  |                           |                |                      |                              |
| All Locations                                 | 167.4 ± 4.1 | 126.8 ± 3.2   | 40.6 ± 2.4       | 238.0 ± 5.3               | 111.2 ± 2.6    | 5.8 ± 0.04           | 68.8 ± 2.5                   |
| Imperial Valley                               | 172.1 ± 4.6 | 120.7 ± 3.0   | 51.4 ± 3.6       | 238.4 ± 5.4               | 117.7 ± 3.0    | 5.8 ± 0.05           | 62.8 ± 2.5                   |
| Sacramento Valley                             | 147.2 ± 2.0 | 115.8 ± 1.7   | 31.4 ± 0.8       | 213.2 ± 2.6               | 97.4 ± 1.3     | 5.9 ± 0.02           | 70.7 ± 4.8                   |
| San Joaquin Valley                            | 182.8 ± 3.6 | 143.9 ± 1.7   | 38.9 ± 2.3       | 262.4 ± 2.5               | 118.5 ± 1.3    | 6.0 ± 0.03           | 72.9 ± 4.6                   |
| <b>Source of Variation</b>                    |             |               |                  |                           |                |                      |                              |
| Genotype† ( <i>P</i> )                        | < 0.0001    | < 0.0001      | < 0.0001         | < 0.0001                  | < 0.0001       | < 0.0001             | 0.056                        |
| Location‡ ( <i>P</i> )                        | < 0.0001    | < 0.0001      | 0.8              | < 0.0001                  | < 0.0001       | 0.2                  | 0.6                          |
| Genotype*Location† ( <i>P</i> )               | 0.07        | < 0.0001      | 0.0002           | 0.0016                    | 0.06           | 0.0032               | 0.2                          |
| Block(Location)† ( <i>P</i> )                 | 0.6         | 0.6           | 0.2              | 0.9                       | 0.95           | 0.1                  | 0.4                          |
| Variation Explained ( <i>R</i> <sup>2</sup> ) | 0.99        | 0.98          | 0.98             | 0.97                      | 0.95           | 0.99                 | 0.64                         |

3  
 4 RVU = Rapid Visco Units

5 † Error used = MS(Error)

6 ‡ Error used = MS(block(location))

7

8

9

10

- 1 Supplementary Table S5. Fermentation response indices in rats fed Inulin and Cellulose diets. Untransformed  
 2 arithmetic means are reported.

| Cecal Contents     | Inulin       | Cellulose    |
|--------------------|--------------|--------------|
| Weight (g)         | 3.88 ± 0.39  | 1.70 ± 0.19  |
| pH                 | 5.98 ± 0.10  | 7.66 ± 0.04  |
| SCFAs (μmol)       |              |              |
| Total†             | 668.0 ± 84.9 | 113.2 ± 11.5 |
| Acetate            | 296.3 ± 42.7 | 65.4 ± 9.0   |
| Propionate         | 131.2 ± 29.7 | 8.3 ± 1.4    |
| Butyrate           | 98.9 ± 24.7  | 8.6 ± 1.2    |
| Serum Gut Peptides |              |              |
| GLP-1 (pmol/L)     | 0.21 ± 0.06  | 0.26 ± 0.06  |
| PYY (ng/mL)        | 0.70 ± 0.08  | 0.76 ± 0.07  |

3  
 4 † Total SCFAs include acetate, propionate and butyrate.  
 5  
 6  
 7
